# Supplementary material for: Development of a precision medicine pipeline to identify personalized treatments for colorectal cancer
Source: Springer Nature journal article supplement (doi:10.1186/s12885-020-07090-y), 2020-06-24
Supplement: MOESM1 [file 18116218]

# Supplementary Figure 1

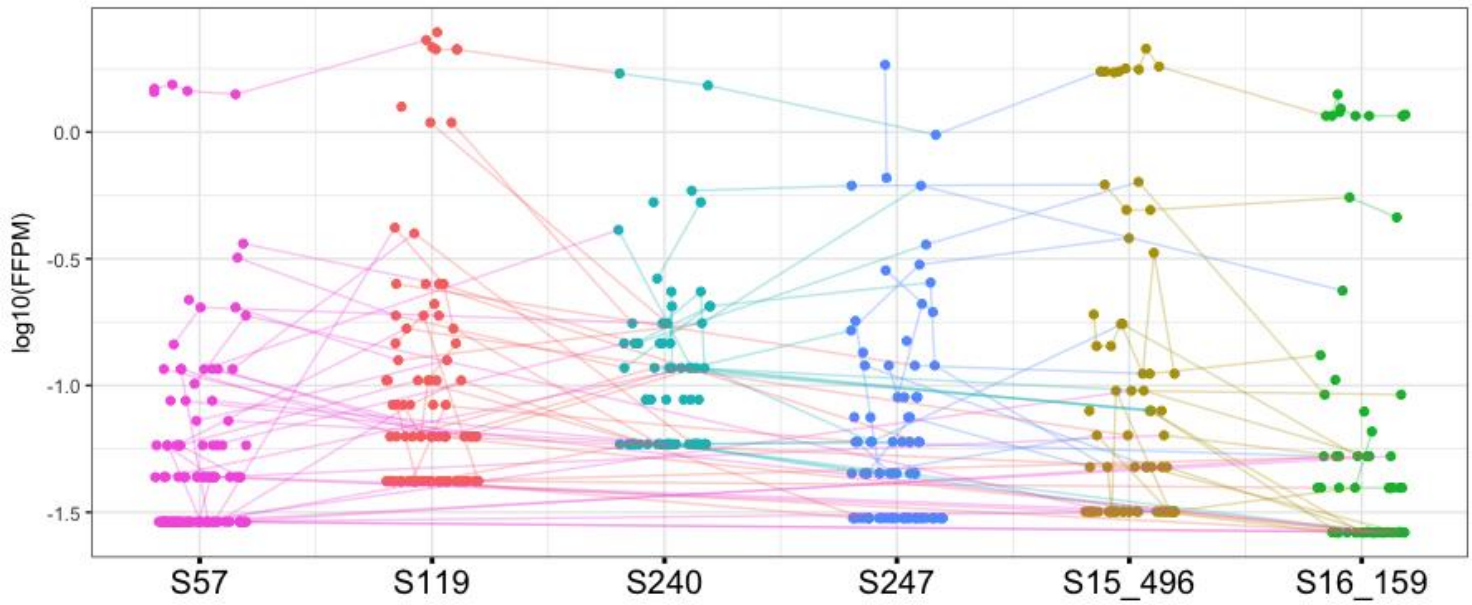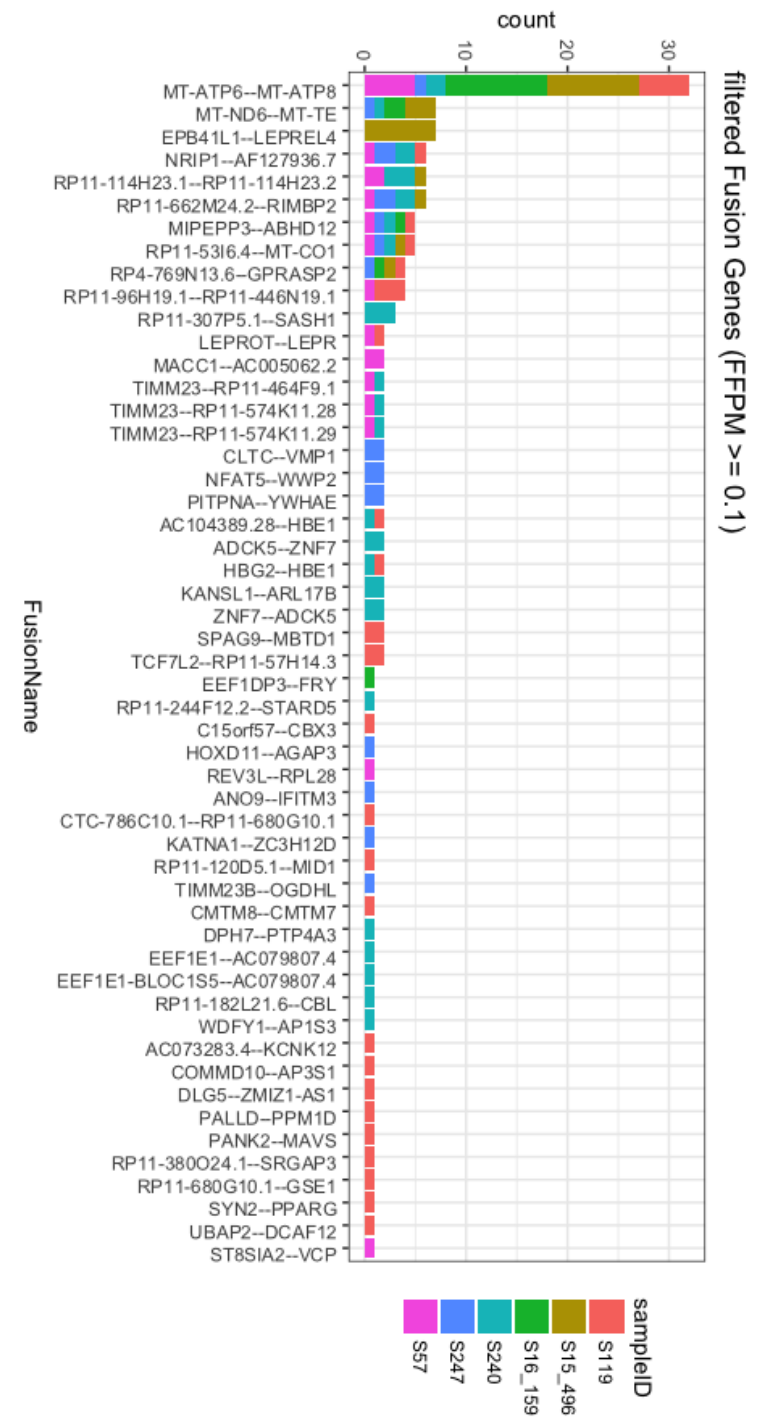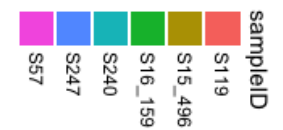

Supplementary Figure 2

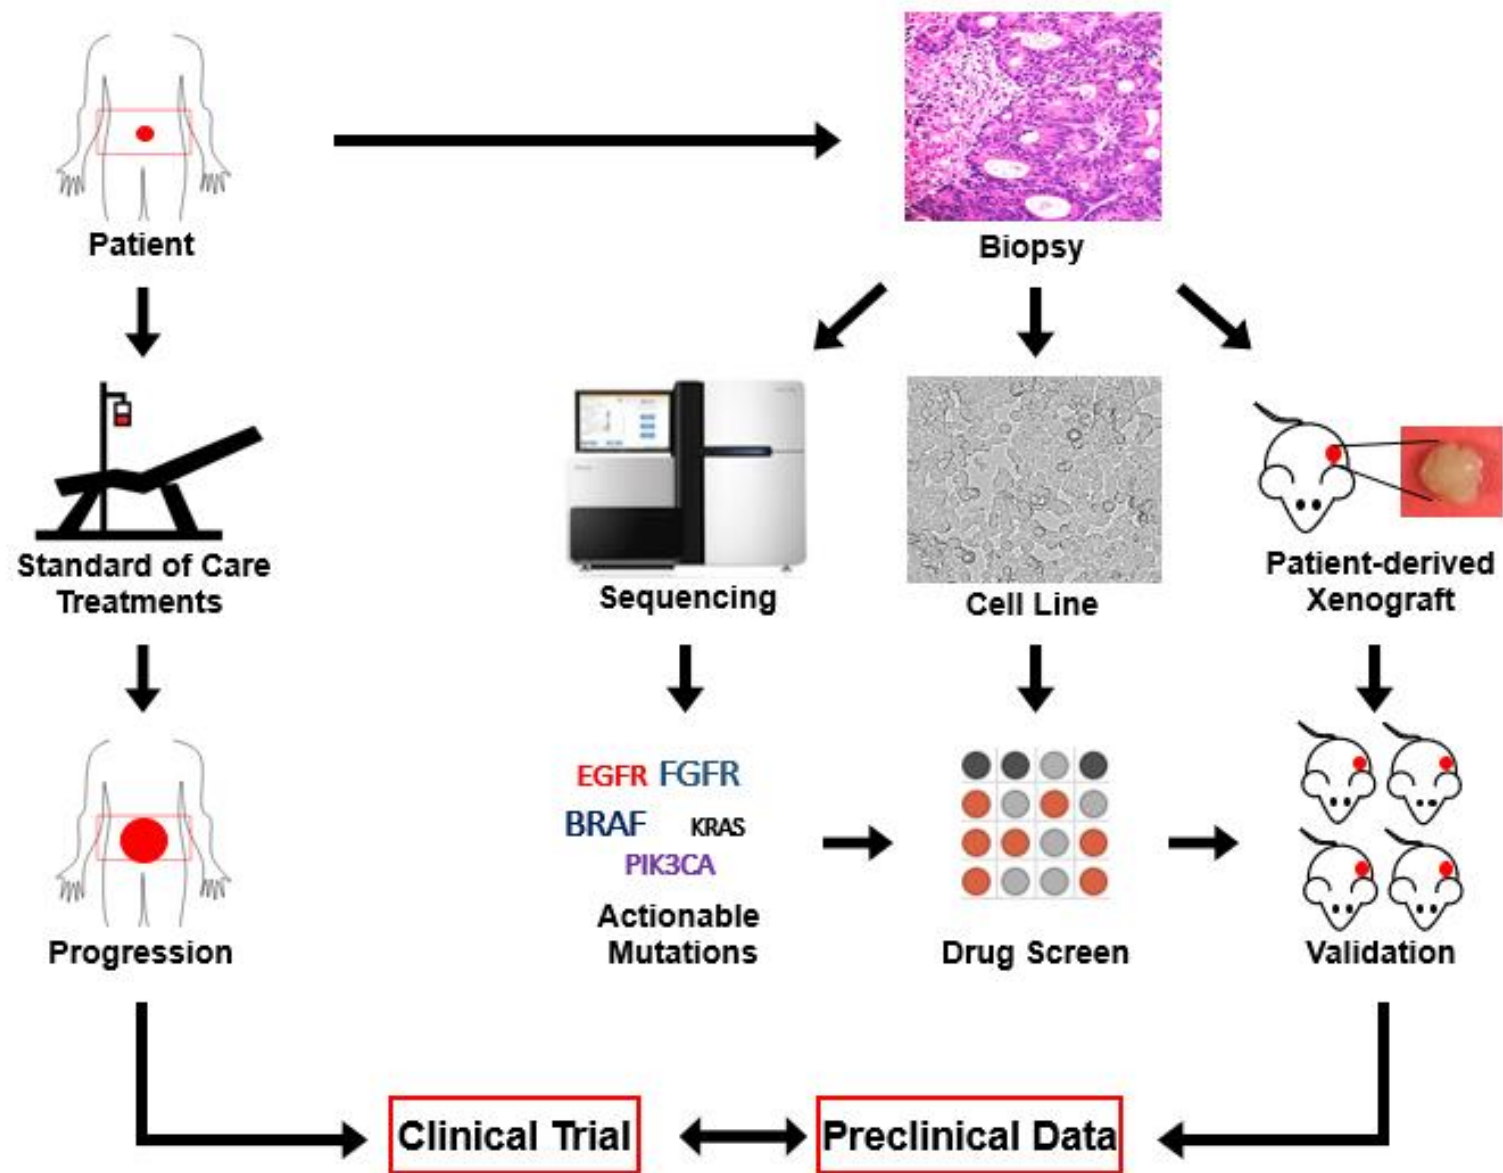

# Supplementary Figure 3

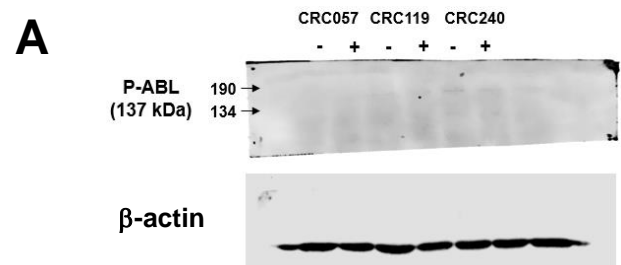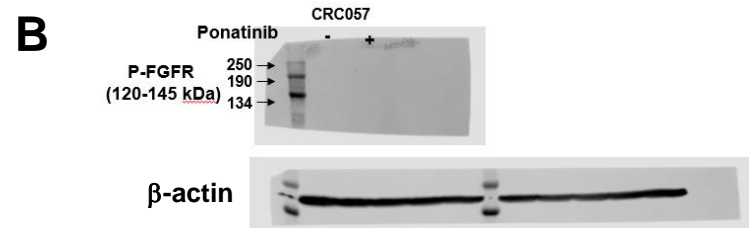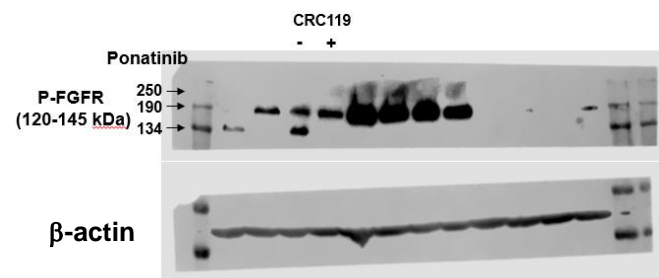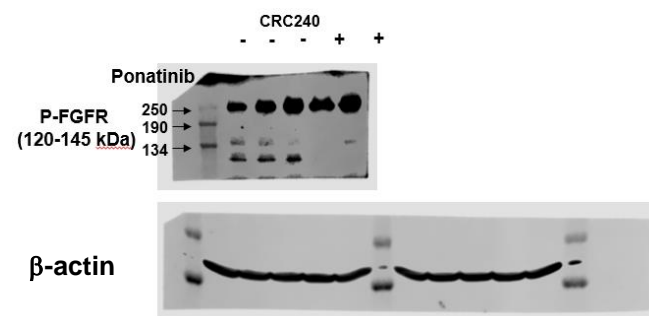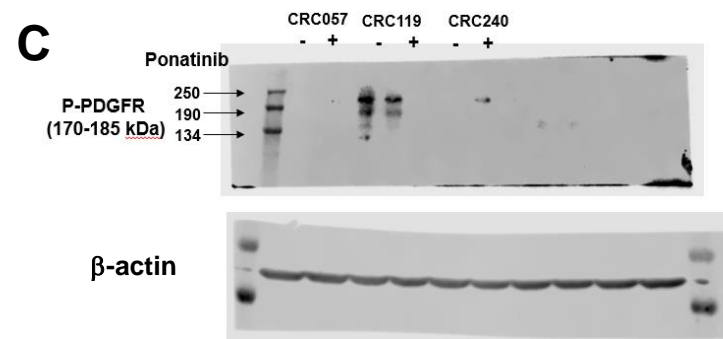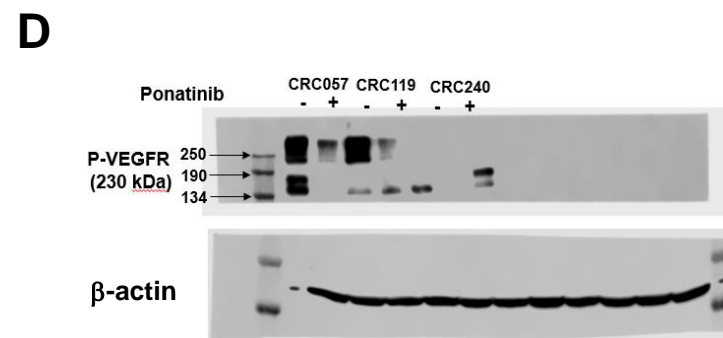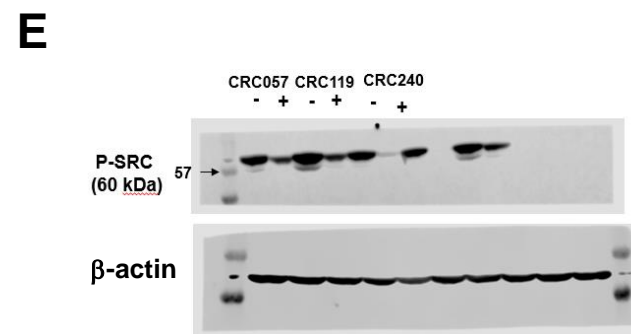

- A. Uncropped blot of p-Abl of Figure 4C
- B. Uncropped blot of p-FGFR of Figure 4C
- C. Uncropped blot of p-PDGFR of Figure 4C
- D. Uncropped blot of p-VEGFR of Figure 4C
- E. Uncropped blot of p-SRC of Figure 4C

# Supplementary Figure 4

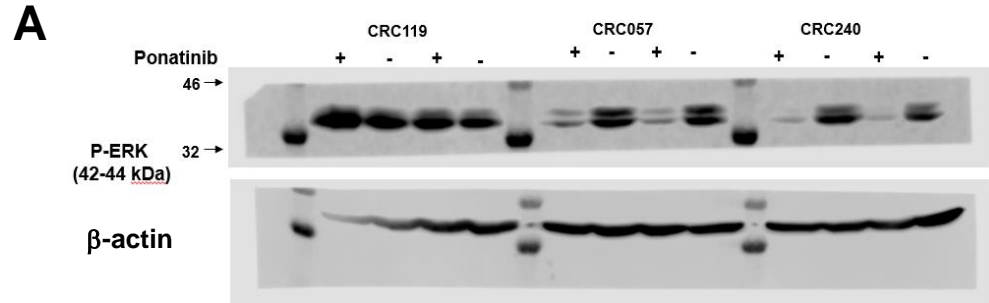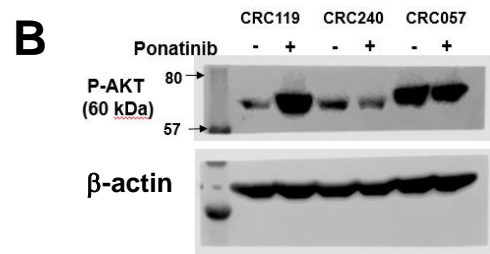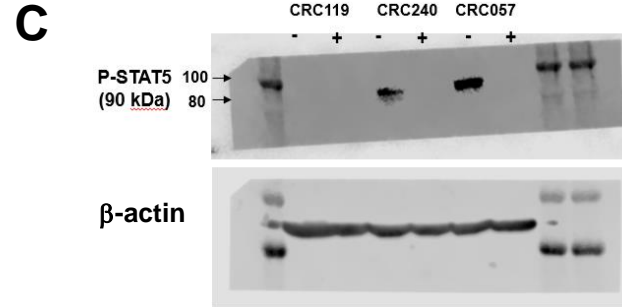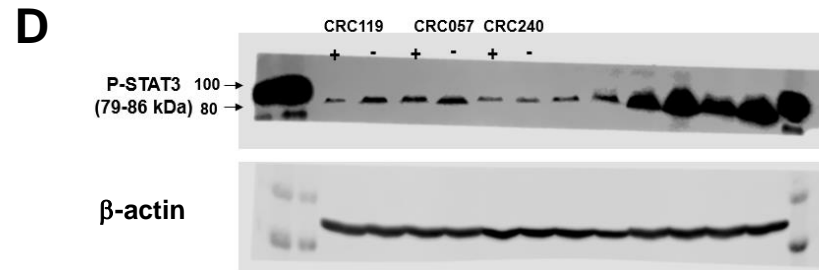

- A. Uncropped blot of p-ERK of Figure 4D
- B. Uncropped blot of p-AKT of Figure 4D
- C. Uncropped blot of p-STAT5 of Figure 4D
- D. Uncropped blot of p-STAT3 of Figure 4D
